# Supplementary material for: Elective and nonelective cesarean section and obesity among young adult male offspring: A Swedish population–based cohort study
Source: PLoS Med. 2019 Dec 6;16(12):e1002996. doi: 10.1371/journal.pmed.1002996 (PMC6897402; doi:10.1371/journal.pmed.1002996)
Supplement: S5 Table — BMI, body mass index. (DOCX) [file pmed.1002996.s005.docx]

| **S5 Table. Association between mode of delivery and obesity status (BMI≥30).** | | | | | | | | |
| --- | --- | --- | --- | --- | --- | --- | --- | --- |
|  |  | **Crude** | | |  | **Adjusteda** | | |
|  | **Cases, No. (%)** | **OR** | **95% CI** | ***p*** |  | **OR** | **95% CI** | ***p*** |
| *Vaginal* | 4,334 (4.87) | 1 | - | - |  | 1 | - | - |
| *Elective cesarean section* | 229 (5.52) | 1.14 | 1.00–1.31 | 0.057 |  | 1.02 | 0.88–1.18 | 0.772 |
| *Nonelective cesarean section* | 231 (5.61) | 1.16 | 1.01–1.33 | 0.032 |  | 0.96 | 0.84–1.11 | 0.603 |
| Empty cells (-) indicate reference group. | | | | | | | | |
| aAdjusted for: Pre-pregnancy maternal body mass index (BMI), maternal diabetes at delivery, maternal hypertension at delivery, maternal smoking, parity, parental education, maternal age at delivery, birth weight standardized according to gestational age, preeclampsia and gestational age. | | | | | | | | |
| Abbreviations: BMI, body mass index; CI, confidence interval; No., number; OR, odds ratio. | | | | | | | | |
